# Supplementary material
Source: PubMed Central journal article supplement (PMC2847528)

**Figure S1.** Western blot with anti-HA antibodies to detect the indicated HA-Bnr1p constructs. Arrows indicate reactive bands of the appropriate molecular weights.

**Figure S2.** Localization of GFP-Bnr1p-L1 and GFP-Bnr1p-L2 in a wild type strain and a *shs1* $\Delta$  strain lacking the non-essential septin.

**Figure S3.** The actin cytoskeleton is relatively normal in cells expressing 3GFP-Bnr1p $\Delta$ L1 or 3GFP-Bnr1p $\Delta$ L2. Cells stained with actin antibody are shown.

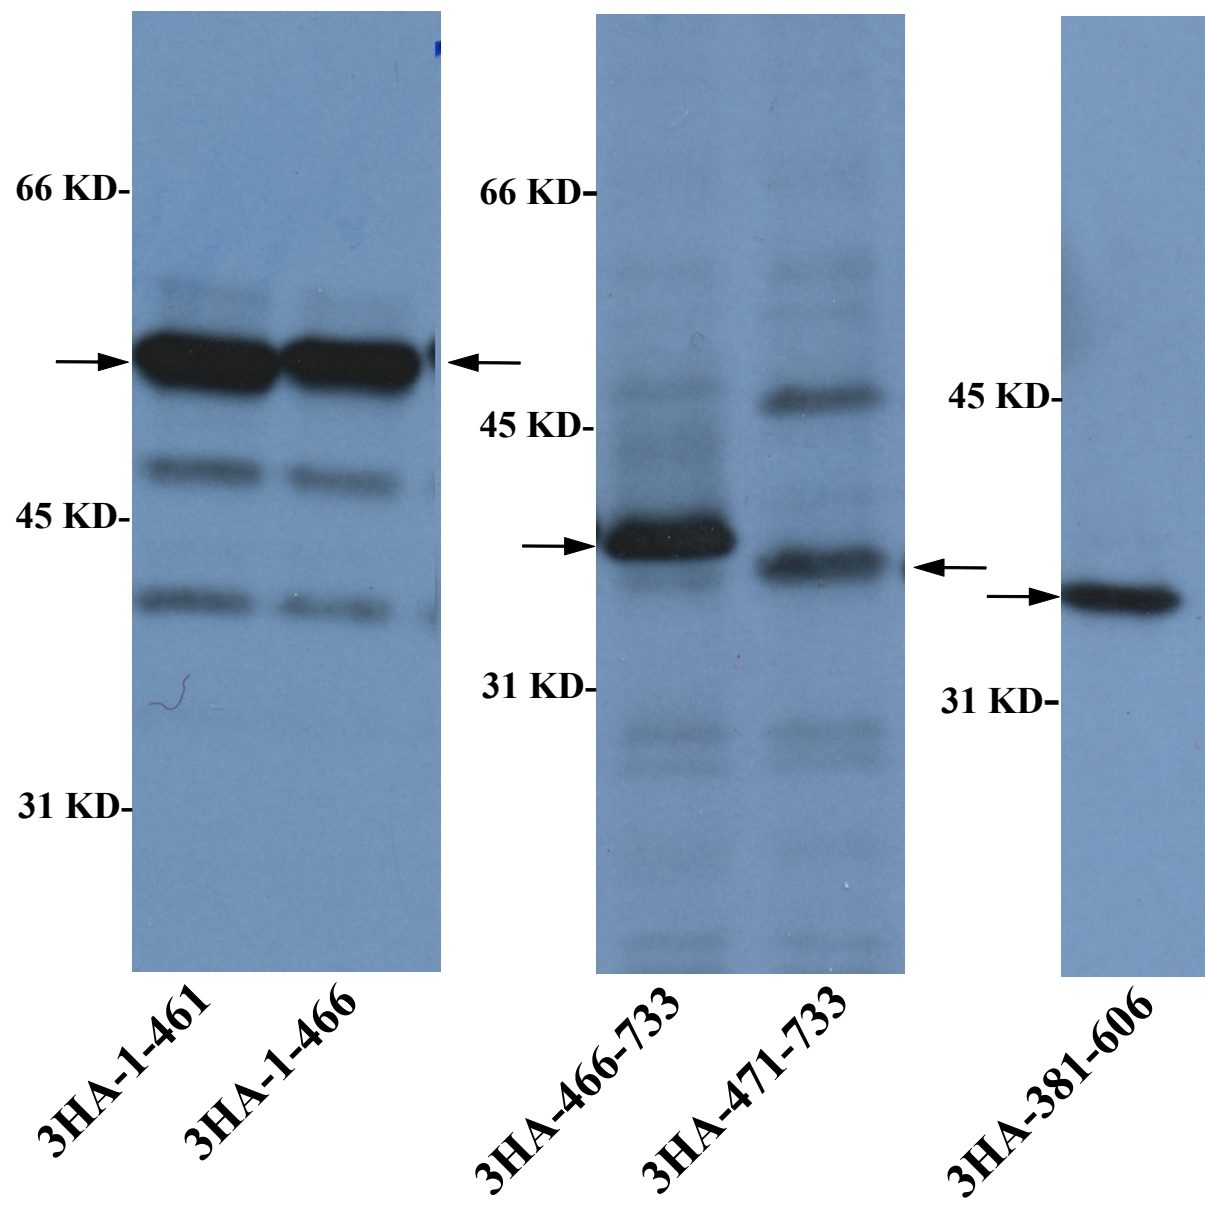

Figure S2

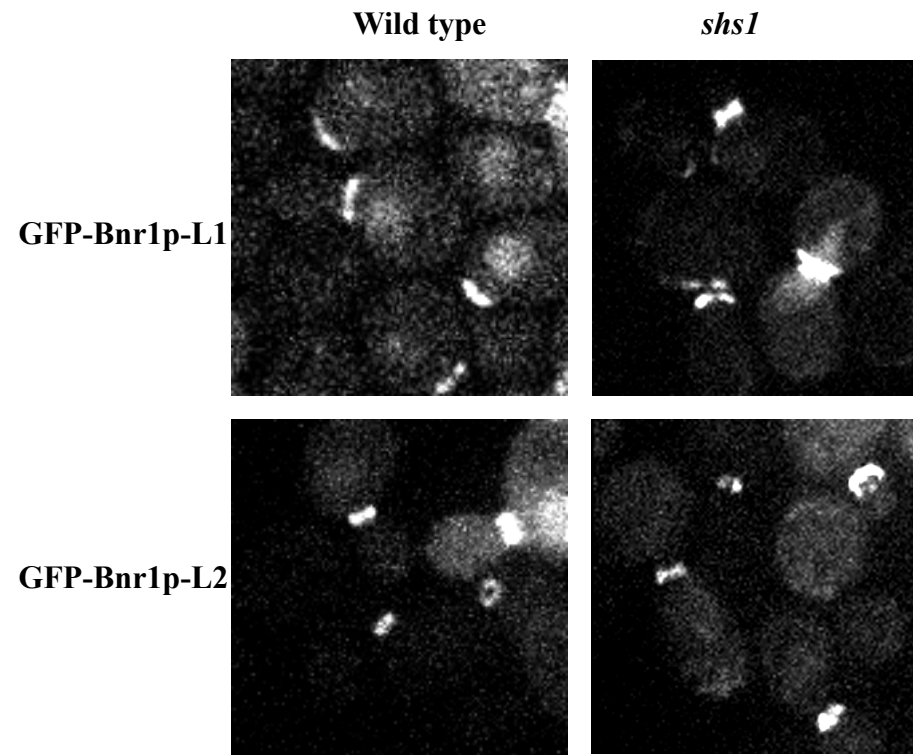

Figure S3

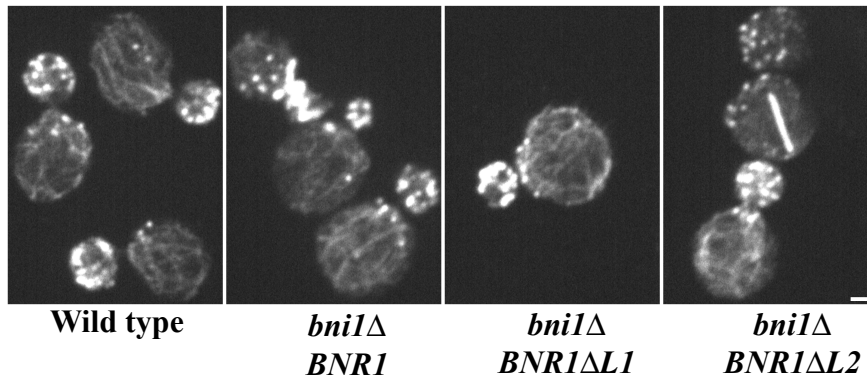

Supplement: E09-10-0861_1.pdf [file E09-10-0861_1.pdf]
